# Supplementary material for: Urine CA125 and HE4 for the Detection of Ovarian Cancer in Symptomatic Women
Source: MDPI journal article supplement (doi:10.3390/cancers15041256), 2023-02-16
Supplement: s1 [file s1]

Article

# Urine CA125 and HE4 for the Detection of Ovarian Cancer in Symptomatic Women—Supplementary materials

Chloe E. Barr, Kelechi Njoku, Gemma L. Owens, Emma J. Crosbie

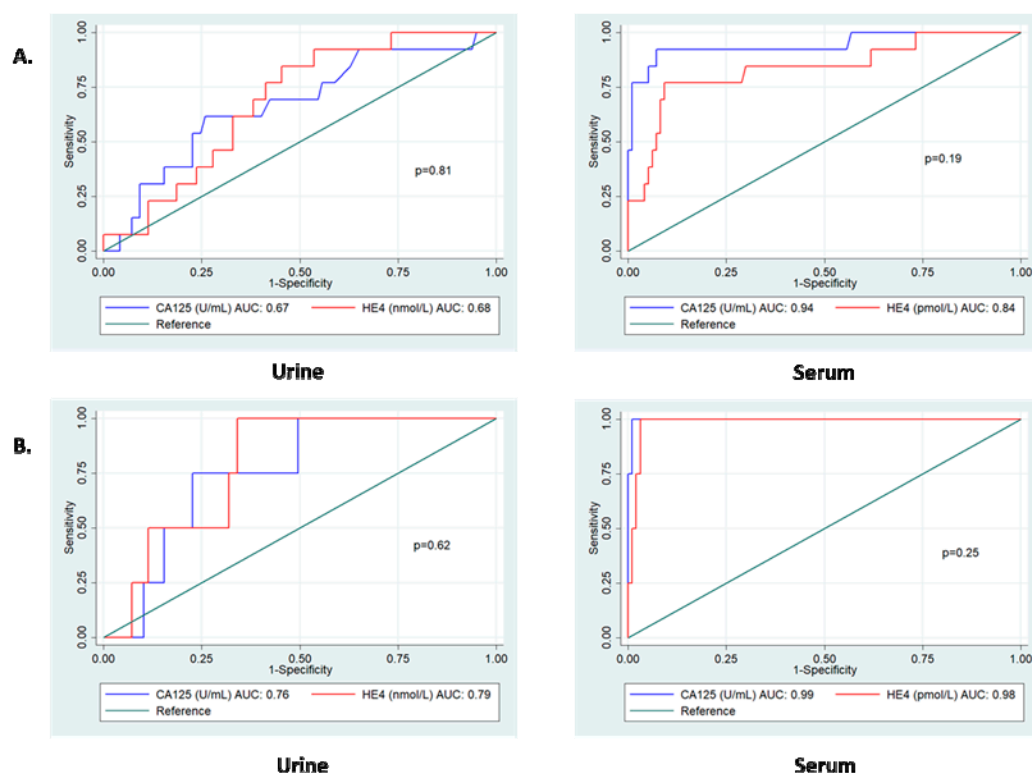

**Figure S1-** ROC Curve analysis of serum and urogenital biomarkers for the detection of early and late stage epithelial ovarian cancer. A- Early stage disease. Urine. CA125 AUC 0.67 (95%CI: 0.51-0.83), HE4 AUC 0.68 (95%CI: 0.56-0.81),  $p=0.81$ . Serum. CA125 AUC 0.94 (95%CI: 0.86-1.00), HE4 AUC 0.84 (95%CI: 0.70-0.97),  $p=0.19$ . B- Late stage disease. Urine. CA125 AUC 0.76 (95%CI: 0.57-0.94), HE4 AUC 0.79 (95%CI: 0.64-0.94),  $p=0.62$ . Serum. CA125 AUC 0.99 (95%CI: 0.99-1.00), HE4 AUC 0.98 (95%CI: 0.96-1.00),  $p=0.25$ .

**Table S1.** Diagnostic accuracy of serum and urine CA125 and HE4 for the detection of early stage disease ( $n=110$ , OC=13 (12%)).

|                                 | Sensitivity % (95%CI) | Specificity % (95%CI) | PPV % (95%CI)    | NPV % (95%CI)    |
|---------------------------------|-----------------------|-----------------------|------------------|------------------|
| Urine CA125 ( $\geq 6.15$ U/mL) | 61.5 (31.6-86.1)      | 74.2 (64.3-82.6)      | 24.2 (11.1-42.3) | 93.5 (85.5-97.9) |
| Urine HE4 ( $\geq 9.1$ nmol/L)  | 61.5 (31.6-86.1)      | 58.8 (48.1-68.7)      | 16.7 (7.48-30.2) | 91.9 (82.2-97.3) |
| Urine Combined*                 | 76.9 (46.2-95.0)      | 45.4 (35.2-55.8)      | 15.9 (7.88-27.3) | 93.6 (82.5-98.7) |
| Serum CA125 ( $\geq 35$ U/mL)   | 84.6 (54.6-98.1)      | 93.8 (87.0-97.7)      | 64.7 (38.3-85.8) | 97.8 (92.4-99.7) |
| Serum HE4 ( $\geq 77$ pmol/L)   | 84.6 (54.6-98.1)      | 52.6 (42.2-62.8)      | 19.3 (10.0-31.9) | 96.2 (87.0-99.5) |

\*either positive. CI- confidence interval. PPV- positive predictive value. NPV- negative predictive value. LR- likelihood ratio
